# Supplementary material for: Prevalence and predictors of hospital prealerting in acute stroke: a mixed methods study
Source: PubMed Central journal article supplement (PMC4941194; doi:10.1136/emermed-2014-204392), 2016-02-23

Figure s1. Patient pathway for acute stroke in UK hospitals offering a stroke service 24 hours a day, 7 days a week

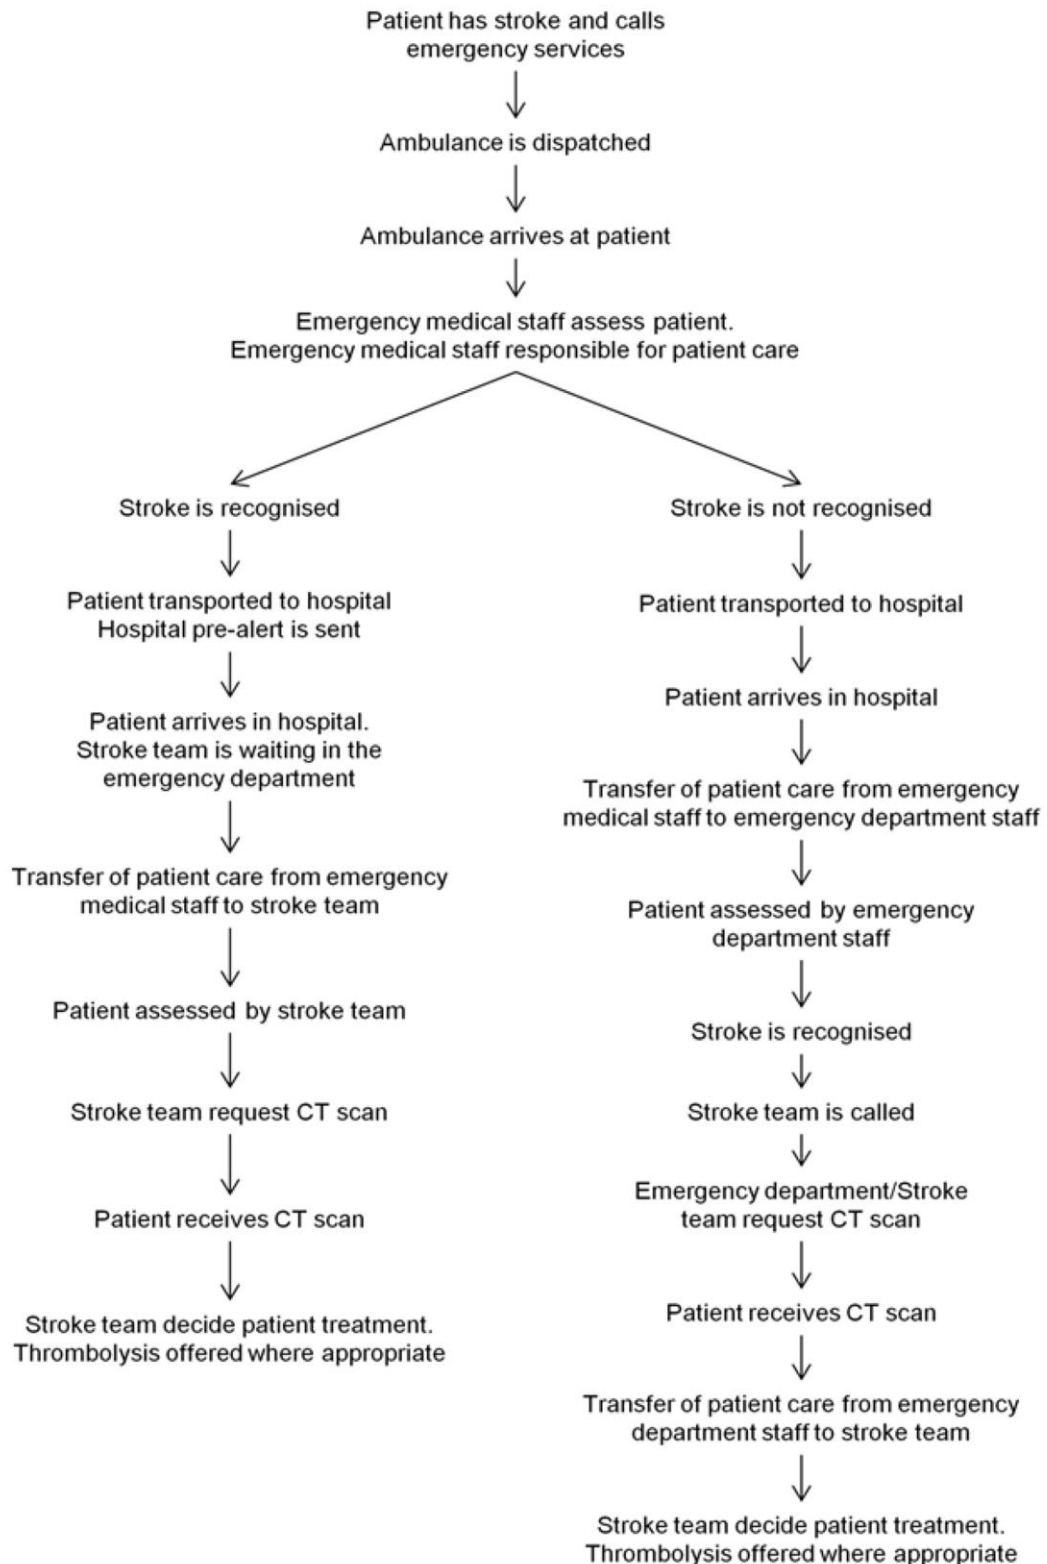

Supplement: emermed-2014-204392supp_figure1.pdf [file emermed-2014-204392supp_figure1.pdf]
