# Supplementary material for: Prevalence and predictors of hospital prealerting in acute stroke: a mixed methods study
Source: PubMed Central journal article supplement (PMC4941194; doi:10.1136/emermed-2014-204392), 2016-02-23
Supplement: emermed-2014-204392supp_figure2.pdf [file emermed-2014-204392supp_figure2.pdf]

Figure s2. Local hospital pre-alert criteria



West Midlands Ambulance Service   
NHS Trust

**Pre-alerting patients for Hyperacute Stroke Assessment**

**FAST TEST**

**Facial weakness:**

- Can the person smile?
- Has their mouth or eye drooped?

**Arm weakness:**

- Can the person raise both arms and hold them for ten seconds without any significant unilateral loss in power?

**Speech problems:**

- Can the person speak clearly and understand what you say?

Test all three: if deficit in any one of the following tests and patient meets the criteria,

**The following must be present:**

- Onset of symptoms within 5 hours
- Positive FAST test.
- Conscious or easily rousable.
- No seizures/fits.
- Blood sugar  $\geq 3$  mmol/l.

**\*\*\*BRING A WITNESS IF POSSIBLE\*\*\***

**Pre-alert Emergency Department saying 'FAST POSITIVE STROKE PATIENT ONSET AT ---- HRS'**

**Document FAST test on PRF**

Version MW 4see [http://treble9.ad.wmas.nhs.uk/trust\\_information/policies/\\_proc\\_\\_strategies/clinical.aspx](http://treble9.ad.wmas.nhs.uk/trust_information/policies/_proc__strategies/clinical.aspx)
